# Supplementary material
Source: PubMed Central journal article supplement (PMC3523839)
Supplement: 1212914109_pnas.201212914SI.pdf [file 1212914109_pnas.201212914SI.pdf]

# Supporting Information

Zhang et al. 10.1073/pnas.1212914109

## SI Materials and Methods

**Cloning.** Expression constructs for p10', p25, p35, and CDK5 are described in Fig. S1 legend.

**Western Blotting.** Cells were lysed in lysis buffer (50 mM Tris-HCl, pH 7.4, 150 mM NaCl, 1 mM EDTA, 1% Triton X-100) and whole cell lysates resolved on SDS/PAGE. Western blotting was performed following standard protocols. Detection was by HRP-catalyzed enhanced chemiluminescence.

**Cell Culture.** All cells were cultured in DMEM supplemented with 10% FBS, 1% L-glutamine, 1% penicillin/streptomycin. Culture dishes were kept in a humidified incubator at 37 °C under 95% air and 5% carbon dioxide gas.

**Plasmid Transfection and Stable Cell Line Generation.** Plasmid transfection was performed using Lipofectamine 2000 (Invitrogen) according to the manufacturer's protocol.

COS7 cells or SH-SY5Y cells were transiently transfected with pCMV3B-p10. Forty-eight hours posttransfection, COS7 cells and SH-SY5Y cells were treated with 200 µg/mL or 50 µg/mL G148 (Invitrogen), respectively. After 3 wk, positive colonies were isolated and Western blot analysis was performed to verify protein expression.

**Lentivirus Production and Transduction.** Lentiviral constructs were cotransfected into HEK293T cells with three other packaging plasmids: pMDL, VSV-G, and Rev at a ratio of 5:5:3:2. Forty-eight hours after transfection, cultured medium was collected and filtered through a 0.45-µm filter. Viruses were either frozen at -70 °C for future use, or concentrated by centrifuging at 120,000 × g

(Beckman; SW-28) for 2 h at 4 °C. After centrifugation, the supernatant was discarded and virus was resuspended in the desired volume of PBS/1% BSA, aliquoted, and stored at -70 °C.

Lentiviral titers were determined by seeding HEK293T cells in six-well plates at  $5 \times 10^5$  cells per well the day before infection with serial dilutions of the concentrated viral stock. After a 4-h incubation, the culture medium was changed and the cells were incubated for 2 d. Cells expressing EGFP were identified using a fluorescence-activated cell sorter (FACS). Titters ranged from 5 to  $10 \times 10^7$  infectious units per milliliter (IU/mL). Neurons were cultured for 4–7 d before virus transduction. Half of the culture medium was removed and lentivirus (MOI = 10) was added to the neuronal culture. The virus-containing medium was removed 4–6 h later and replaced with medium mixture (half of fresh neurobasal medium and half of used medium). Neurons were cultured for an additional 48–72 h before treatment or analysis.

**Protein Immunoprecipitation and Immunoblotting.** Cell lysates were resolved on 4–12% Bis-Tris NuPAGE gels (Invitrogen) and proteins transferred onto nitrocellulose membranes (Bio-Rad) by semidry transfer. Western blotting was performed following standard protocols. Membranes were incubated with primary antibody for 1 h (C-19 or N-20 1:500; anti-MAP2, anti-Tuj-1, anti-GFP, anti-myc, and anti-γH2AX 1:1,000; anti-Prx2 1:5,000; and anti-pPrx2 1:100), followed by five times wash with Tris-buffered saline with Tween (TBST) buffer. Corresponding secondary antibodies conjugated to HRP (Jackson Immunoresearch Laboratories) were then added for 1 h before washing with TBST buffer five times. Image development was by enhanced chemiluminescent detection (Promega).

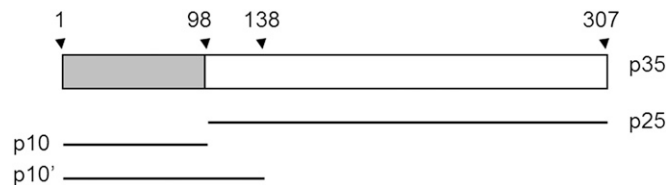

**Fig. S1.** Schematic of p10', p25, and p35. p10', p25, and p35 were PCR amplified and cloned into pCMV3B (Stratagene) at BamH1 and EcoR1 sites. A similar strategy was used to clone full-length CDK5 into pEGFPC1 vector (Clontech). All constructs were then subcloned into pBOBI-CMV lentiviral vectors (from Eng Tan, The Scripps Research Institute, La Jolla, CA) at BamH1 and Xho1 digestion sites. All constructs were verified by sequencing.
